# Supplementary material for: Structural basis of protein phosphatase 2A stable latency
Source: PubMed Central journal article supplement — Nat Commun. 2013 Apr 16;4:1699–. doi: 10.1038/ncomms2663 (PMC3644067; doi:10.1038/ncomms2663), 2013-04-16
Supplement: ncomms2663-s1.pdf [file ncomms2663-s1.pdf]

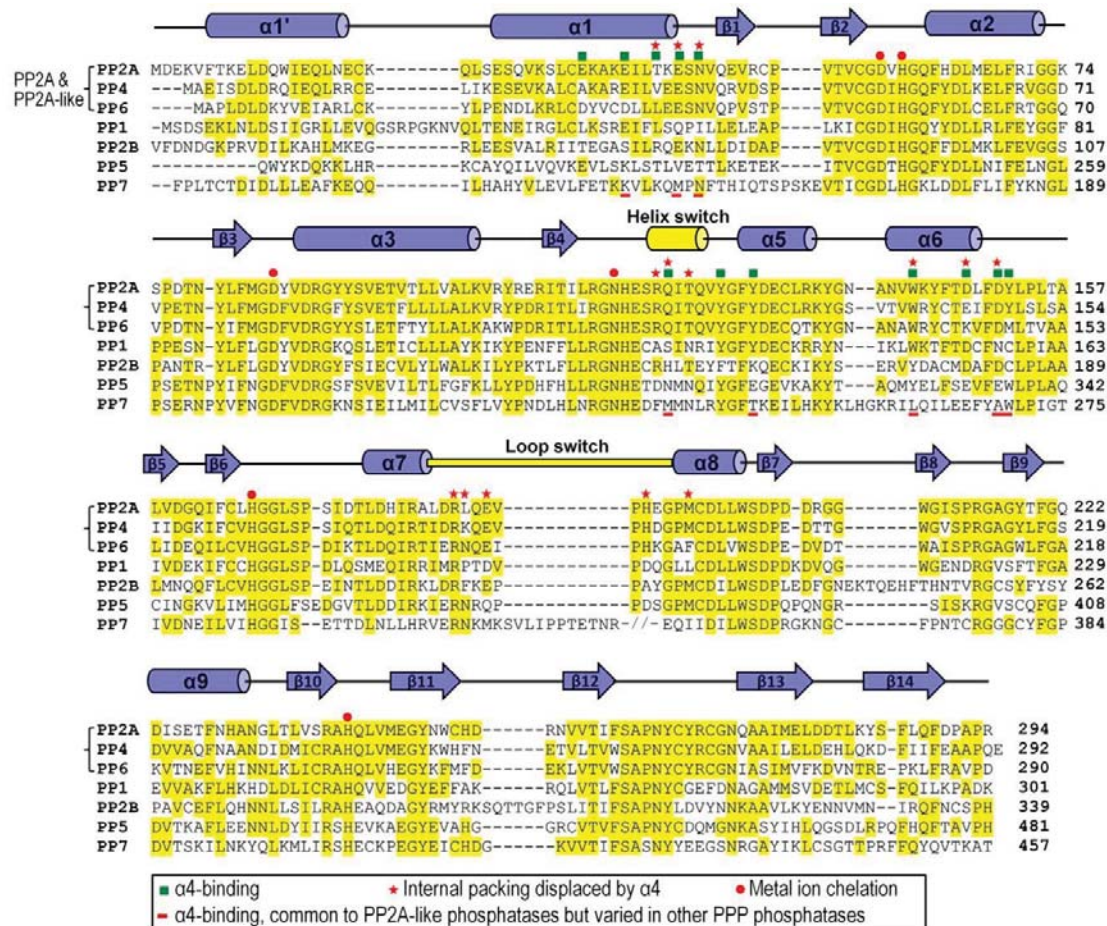

**Supplementary Figure S1.** Sequence alignment of the catalytic subunit of PP2A with other members of the PPP family Ser/Thr phosphatases of human origin. Secondary structural elements of the catalytic subunit of PP2A are indicated above the sequences. Conserved residues are highlighted in yellow. Residues that participate in  $\alpha$ 4-binding are indicated by green squares. Residues whose internal packing is displaced by  $\alpha$ 4 are indicated by red stars.  $\alpha$ 4-binding residues common to PP2A-like phosphatases but varied in other members of the PPP family phosphatases are underlined by red lines. Catalytic metal ion chelating residues are identified by red circles.

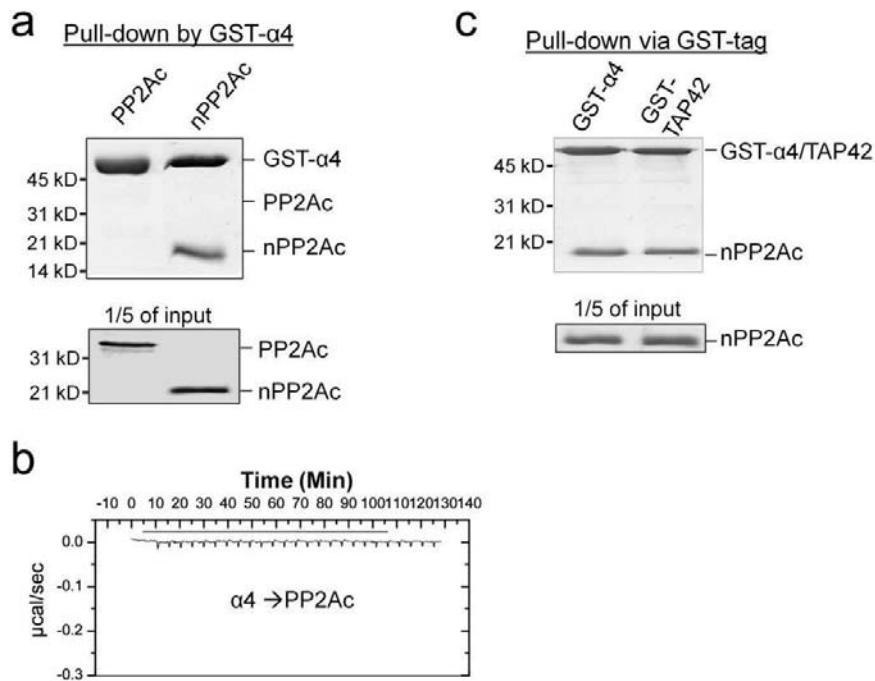

**Supplementary Figure S2.** Interaction of  $\alpha$ 4 with active, full-length PP2Ac and nPP2Ac (PP2Ac 1-153). (a) Pull-down of active and nPP2Ac by GST-tagged  $\alpha$ 4. The bound protein samples and protein inputs for pull-down were visualized on SDS-PAGE by Coomassie blue staining. (b) Isothermal titration calorimetry does not detect interaction between active PP2Ac and  $\alpha$ 4. (c) Pull-down of nPP2Ac by GST-tagged  $\alpha$ 4 and TAP42 similar to (a).

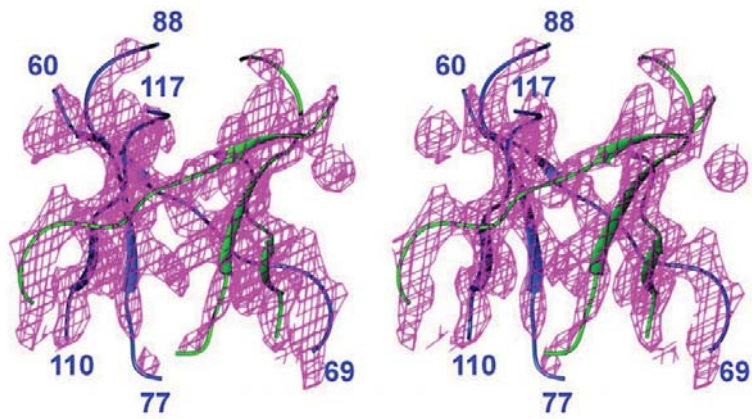

**Supplementary Figure S3.** The  $\beta$ -sheet in the nPP2Ac-  $\alpha$ 4 complex (blue) and the self-associated, symmetry-related  $\beta$ -sheet (green) in ribbon. The 2Fo-Fc electron density map at  $2.0\sigma$  is shown and colored magenta.

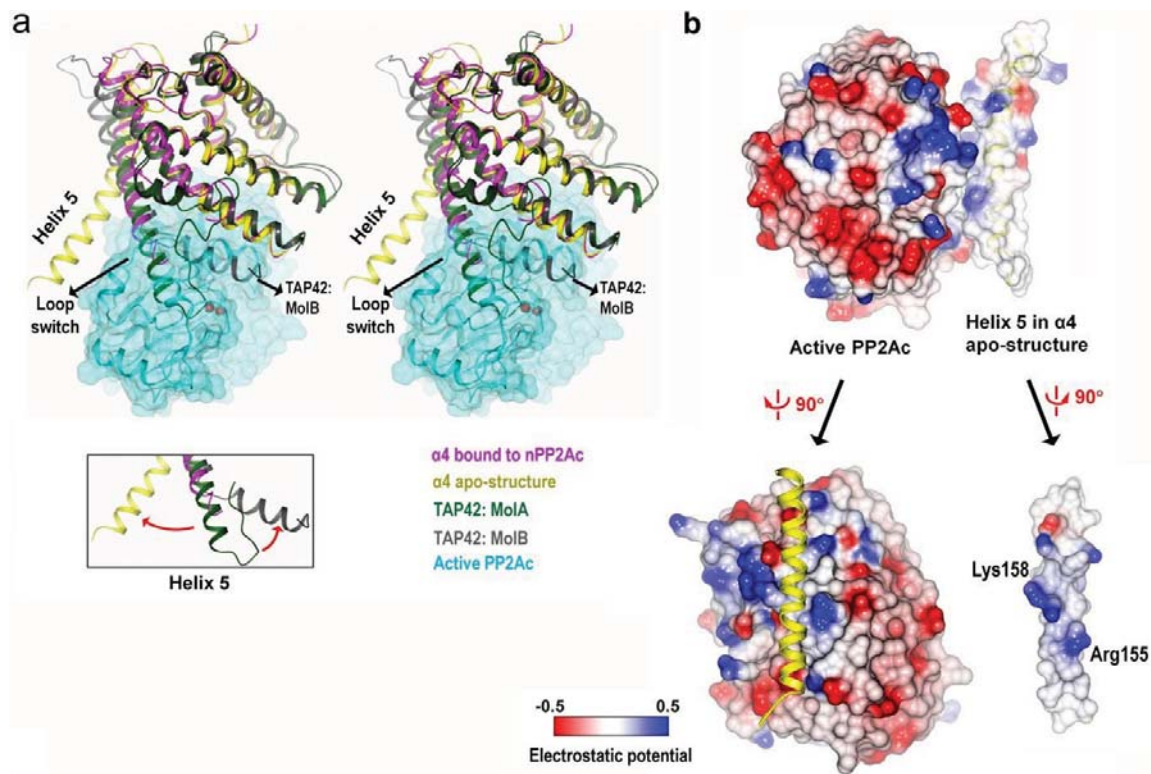

**Supplementary Figure S4.** None of various conformations of  $\alpha 4$ /TAP42 is compatible for binding with active PP2Ac. **(a)** Alignment of structures of the nPP2Ac- $\alpha 4$  complex,  $\alpha 4$  apo-structure (3QC1) and two different conformations of TAP42 (2V0P: MolA and MolB) via  $\alpha 4$  helix 1-4. The structure of active PP2Ac is aligned with the nPP2Ac- $\alpha 4$  complex via the unaltered helices in the helix motif of PP2Ac. All models are shown in ribbon and colored as indicated except that active PP2Ac is also shown in semi-transparent surface. Conformational variation in helix 5 of  $\alpha 4$ /TAP42 is highlighted (inlet, lower left). Helix 5 of TAP42/MolA overlaps with that of nPP2Ac-bound  $\alpha 4$  while that of TAP42/MolB clashes into the helix motif of PP2Ac, suggesting that TAP42 interacts with PP2Ac using MolA conformation. **(b)** Electrostatic potential shows minor overlaps but repulsive electrostatic contacts between active PP2Ac and helix 5 of  $\alpha 4$  apo-structure. Helix 5 of  $\alpha 4$  apo-structure is shown in ribbon (lower left) to indicate its relative position to active PP2Ac.

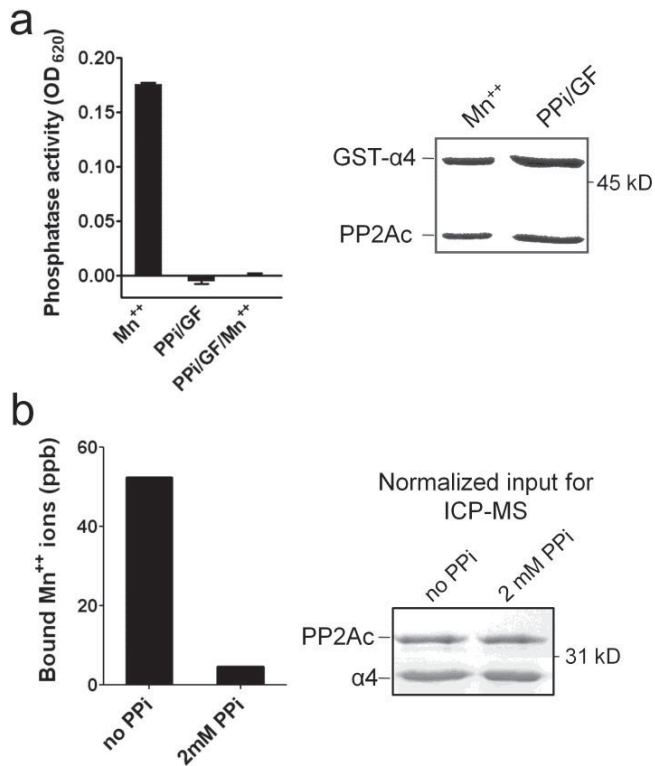

**Supplementary Figure S5.** α4-bound PP2Ac was stabilized in a metal-vacant, inactive form.

(a) Phosphatase activity of the GST-α4/PP2Ac purified over gel filtration column after inactivation by PPi at 37°C for 10 minutes (PPi/GF) followed by re-activation by Mn<sup>++</sup> (PPi/GF/Mn<sup>++</sup>). The mixture of GST-α4 and PP2Ac incubated in the presence of 50 μM Mn<sup>++</sup> at 37°C for 10 minutes (Mn<sup>++</sup>) was used as control. The sample inputs for the phosphatase assay are visualized on SDS-PAGE by Coomassie blue staining. (b) ICP-MS determines the metal content of PP2Ac mixed with α4 prior to and after inactivation by 2 mM PPi at 37°C for 10 minutes followed by re-activation by Mn<sup>++</sup>. Free metal ions were removed by gel filtration prior to ICP-MS analysis. The normalized inputs for α4 and PP2Ac for ICP-MS were visualized on SDS-PAGE by Coomassie blue staining.

**Supplementary Table S1.** Crystallographic data collection, phasing, and refinement.

---

| <u>Data Collection and Phasing</u> |                          |
|------------------------------------|--------------------------|
| Crystal                            | $\alpha$ 4-PP2Ac (1-153) |
| Data set                           | SeMet SAD                |
| Space group                        | P3221                    |
| Unit Cell                          |                          |
| a/b/c                              | 116.127/116.127/81.230   |
| $\alpha/\beta/\gamma$              | 90.00/90.00/120.00       |
| Wavelength (Å)                     | 0.9792                   |
| Resolution (Å)                     | 50.0-2.797 (2.85-2.797)  |
| Unique observations                | 15948 (777)              |
| Redundancy                         | 20.1 (10.7)              |
| R-symm <sup>1</sup>                | 0.070 (0.545)            |
| Completeness (%)                   | 99.8 (98.7)              |
| I/SigI                             | 28.7 (3.22)              |

---

| <u>Phasing</u>   |             |
|------------------|-------------|
| Anomalous signal | 1.63 (0.70) |
| Figure of merit  | 0.65        |

---

| <u>Refinement</u>                                              |               |
|----------------------------------------------------------------|---------------|
| Resolution (Å)                                                 | 37.7-2.797    |
| No. reflections (free)                                         | 15885 (796)   |
| Completeness (%)                                               | 99.54 (98.01) |
| R-factor (%)                                                   | 17.87         |
| R-free (%)                                                     | 22.24         |
| Number of atoms (total)                                        | 2708          |
| Protein                                                        | 2674          |
| Water                                                          | 34            |
| RMSD bond lengths (Å)                                          | 0.009         |
| RMSD bond angles (°)                                           | 1.21          |
| Average B-factors<br>(with TLS contribution) (Å <sup>2</sup> ) | 84.5          |
| Ramachandran plot:                                             |               |
| Preferred regions (%)                                          | 94.0          |
| Allowed regions (%)                                            | 5.02          |
| Outliers (%)                                                   | 0.98          |

---

X-ray diffraction data were collected on one crystal. Values in parentheses are for highest-resolution shell.
